# Supplementary material for: Ptpn11 Deletion in CD4+ Cells Does Not Affect T Cell Development and Functions but Causes Cartilage Tumors in a T Cell-Independent Manner
Source: PubMed Central journal article supplement (PMC5650614; doi:10.3389/fimmu.2017.01326), 2017-10-16
Supplement: presentation_1.pdf [file presentation_1.pdf]

## Supplementary Figure 1

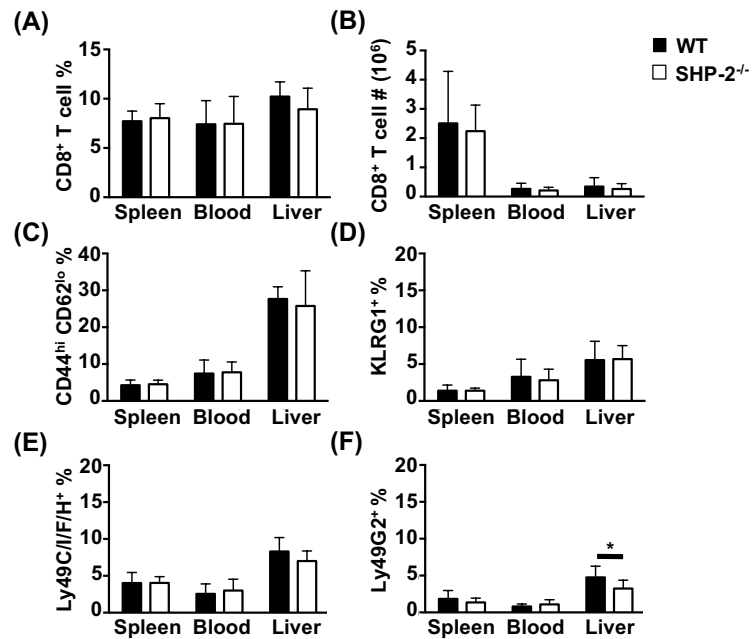

**Supplementary Figure 1. SHP-2 deficiency does not affect T cell development.** Absolute frequencies (A) and numbers (B) of CD8<sup>+</sup> T cells were determined by flow cytometry and cell counting. Frequencies of CD44<sup>hi</sup>CD62L<sup>lo</sup> (C) KLRG1<sup>+</sup> (D), Ly49C/I/F/H<sup>+</sup> (E), and Ly49G2<sup>+</sup> (F) CD8<sup>+</sup> T cells from the spleen, blood, and liver of WT and SHP-2<sup>-/-</sup> mice were determined by flow cytometry. T cells were defined as TCRβ<sup>+</sup> lymphocytes. n = 11 WT and 10 SHP-2<sup>-/-</sup> mice over three independent experiments. Graphs show mean and standard deviation. \* = *p* < 0.05.
