# Supplementary material for: Ptpn11 Deletion in CD4+ Cells Does Not Affect T Cell Development and Functions but Causes Cartilage Tumors in a T Cell-Independent Manner
Source: PubMed Central journal article supplement (PMC5650614; doi:10.3389/fimmu.2017.01326), 2017-10-16
Supplement: presentation_2.pdf [file presentation_2.pdf]

## Supplementary Figure 2

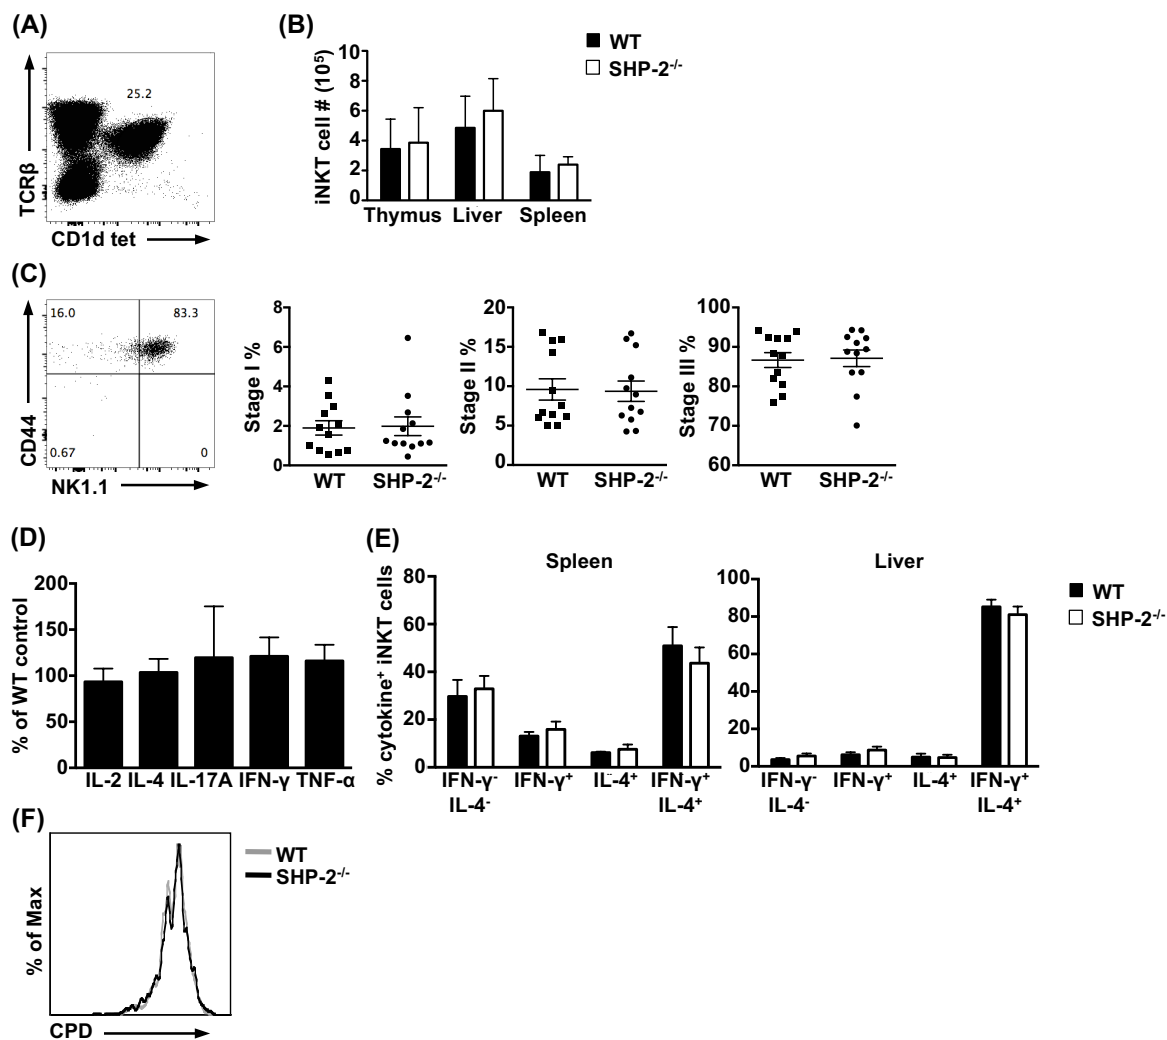

**Supplementary Figure 2. SHP-2 deficiency does not affect iNKT cell development and functions.** (A) Representative FACS plot shows hepatic iNKT cells in a WT mouse. (B) Absolute numbers of iNKT cells in WT and SHP-2<sup>-/-</sup> mice were determined by flow cytometry and cell counting. iNKT cells were defined as HSA<sup>lo</sup>CD1tet<sup>+</sup> lymphocytes in the thymus and TCR $\beta$ <sup>+</sup>CD1tet<sup>+</sup> lymphocytes in the liver and spleen. n = 12 WT and 12 SHP-2<sup>-/-</sup> mice over four independent experiments. Graphs show mean. (C) Representative FACS plot shows thymic iNKT cell maturation in a WT mouse. Thymic iNKT cell maturation can be divided into three stages. Stage I (CD44<sup>lo</sup>NK1.1<sup>-</sup>), Stage II (CD44<sup>hi</sup>NK1.1<sup>-</sup>), and Stage III (CD44<sup>hi</sup>NK1.1<sup>+</sup>) of development is shown in WT and SHP-2<sup>-/-</sup> mice. n = 12 WT and 12 SHP-2<sup>-/-</sup> mice over four independent experiments. Graphs show mean. (D) *In vitro* cytokine production was measured by CBA Flex Set after TCR cross-linking with  $\alpha$ -CD3 $\epsilon$  and  $\alpha$ -CD28 antibodies for 24 hours. Graph shows mean and standard deviation of three independent experiments normalized to controls. (E) *In vivo* cytokine production was measured by intracellular cytokine staining at 2 hours post-injection with 2 $\mu$ g/mouse  $\alpha$ -GalCer. n = 3 WT and 3 SHP-2<sup>-/-</sup> mice. Graphs show mean and standard deviation. (F) The proliferative capacity of iNKT cells was determined by injecting cells into a leukopenic environment. Representative FACS plot shows proliferation of SHP-2<sup>-/-</sup> (CD45.2<sup>+</sup>, black) and WT (CD45.1<sup>+</sup>, grey) iNKT cells (CD1tet<sup>+</sup>TCR $\beta$ <sup>+</sup>) in the liver.
