# Supplementary material for: Ptpn11 Deletion in CD4+ Cells Does Not Affect T Cell Development and Functions but Causes Cartilage Tumors in a T Cell-Independent Manner
Source: PubMed Central journal article supplement (PMC5650614; doi:10.3389/fimmu.2017.01326), 2017-10-16
Supplement: presentation_3.pdf [file presentation_3.pdf]

### Supplementary Figure 3

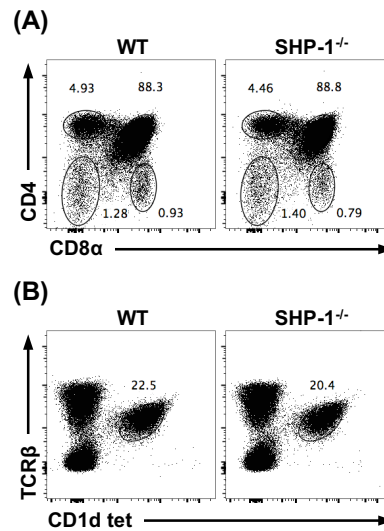

**Supplementary Figure 3. SHP-1 is dispensable for T and iNKT cell development.** (A) Representative FACS plots show thymic T cell development in SHP-1<sup>fl/+</sup>-CD4Cre (WT) and SHP-1<sup>fl/fl</sup>-CD4Cre (SHP-1<sup>-/-</sup>) mice. (B) Representative FACS plots show hepatic iNKT cells in WT and SHP-1<sup>-/-</sup> mice. Data are representative of at least two independent experiments, n = 9 Het and n=8 KO mice.
