# Supplementary material for: Ptpn11 Deletion in CD4+ Cells Does Not Affect T Cell Development and Functions but Causes Cartilage Tumors in a T Cell-Independent Manner
Source: PubMed Central journal article supplement (PMC5650614; doi:10.3389/fimmu.2017.01326), 2017-10-16
Supplement: presentation_4.pdf [file presentation_4.pdf]

## Supplementary Figure 4

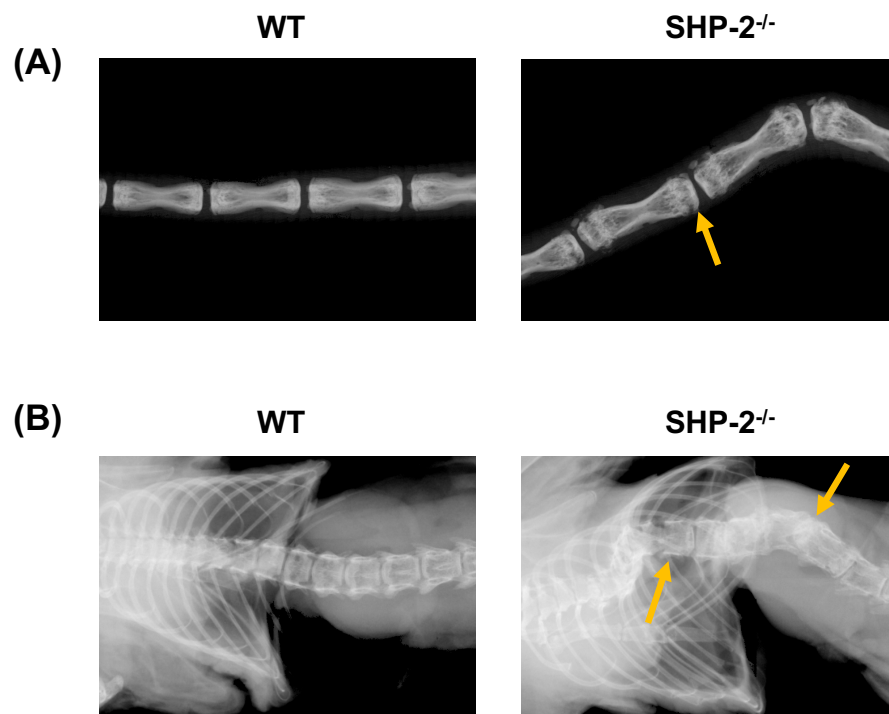

**Supplementary Figure 4. Adult SHP-2<sup>-/-</sup>CD4-Cre mice develop skeleton abnormalities.** Representative Faxitron X-ray of euthanized mice. A) The arrow highlights the location of the kinky tails. B) Arrows highlight the spine abnormality. Each analysis was performed on at least 3 mice per genotype.
