# Supplementary material for: Ptpn11 Deletion in CD4+ Cells Does Not Affect T Cell Development and Functions but Causes Cartilage Tumors in a T Cell-Independent Manner
Source: PubMed Central journal article supplement (PMC5650614; doi:10.3389/fimmu.2017.01326), 2017-10-16
Supplement: presentation_5.pdf [file presentation_5.pdf]

## Supplementary Figure 5

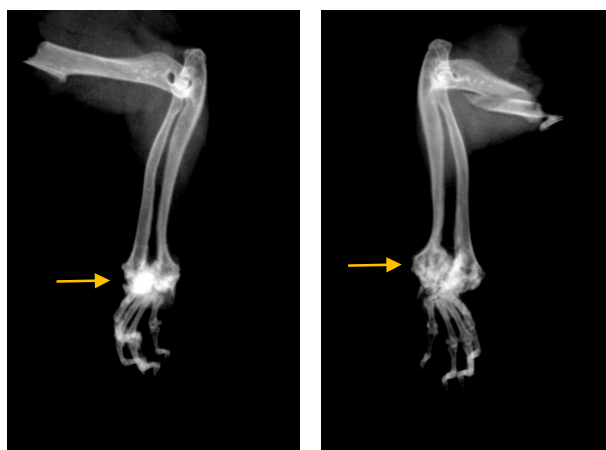

**Supplementary Figure 5. Adult SHP-2<sup>-/-</sup>CD4-Cre RAG1<sup>-/-</sup> mice develop cartilage tumors.** Representative Faxitron X-ray of euthanized mice. Arrows highlight the location of the cartilage tumors on wrists. Analysis was performed on 3 SHP-2<sup>-/-</sup>RAG1<sup>-/-</sup>CD4-Cre mice and controls.
